# Supplementary material for: A 3D Cu(ii) tetrazolate coordination polymer based on pentanuclear units with a large coercive field
Source: Royal Society of Chemistry journal article supplement (doi:10.1039/c9dt04113c), 2019-11-28
Supplement: c9dt04113c1.pdf [file c9dt04113c1.pdf]

## Supporting Information

### A 3D Cu(II) Tetrazolate Coordination Polymer Based on Pentanuclear Units with Large Coercive Field

**Table S1** Crystallographic data and structure refinement of (1)

| Empirical formula                                            | $C_6H_{21}Cu_{4.5}N_{12}O_{13.5}S$                            |
|--------------------------------------------------------------|---------------------------------------------------------------|
| Formula weight (g/mol)                                       | 794.75                                                        |
| Crystal system                                               | Orthorhombic                                                  |
| Space group                                                  | <i>Pnma</i>                                                   |
| <i>a</i> (Å)                                                 | 10.4983                                                       |
| <i>b</i> (Å)                                                 | 30.2025                                                       |
| <i>c</i> (Å)                                                 | 16.5890                                                       |
| $\alpha$ (°)                                                 | 90                                                            |
| $\beta$ (°)                                                  | 90                                                            |
| $\gamma$ (°)                                                 | 90                                                            |
| <i>V</i> (Å <sup>3</sup> )                                   | 5259.96                                                       |
| <i>Z</i>                                                     | 4                                                             |
| $\rho$ (g cm <sup>-3</sup> )                                 | 1.976                                                         |
| <i>T</i> (K)                                                 | 296(2)                                                        |
| $\mu$ (mm <sup>-1</sup> )                                    | 2.747                                                         |
| <i>F</i> (000)                                               | 3060                                                          |
| Reflections collected/unique                                 | 9507 / 1941                                                   |
| <i>R</i> (int)                                               | 0.00053(14)                                                   |
| Final <i>R</i> indices [ <i>I</i> > 2 $\sigma$ ( <i>I</i> )] | <i>R</i> <sub>1</sub> =0.0482, <i>wR</i> <sub>2</sub> =0.1320 |

**Table S2** Bond lengths(Å) and angles(°) of (**1**)

|                    |            |                     |            |
|--------------------|------------|---------------------|------------|
| Cu(1)-O(7)#1       | 1.904(4)   | Cu(1)-O(5)          | 1.986(4)   |
| Cu(1)-N(1)         | 1.989(4)   | Cu(1)-N(5)          | 2.082(4)   |
| Cu(2)-O(5)         | 1.916(4)   | Cu(2)-N(2)          | 1.981(4)   |
| Cu(2)-O(6)         | 1.983(3)   | Cu(2)-N(7)#2        | 2.001(5)   |
| Cu(2)-O(1)         | 2.348(4)   | Cu(3)-O(7)          | 1.917(4)   |
| Cu(3)-N(6)#2       | 1.971(4)   | Cu(3)-N(11)         | 1.986(4)   |
| Cu(3)-O(6)         | 2.016(4)   | Cu(3)-O(2)          | 2.283(4)   |
| Cu(4)-O(8)         | 1.886(4)   | Cu(4)-N(10)         | 1.974(4)   |
| Cu(4)-O(6)         | 1.996(4)   | Cu(4)-N(3)          | 1.999(4)   |
| Cu(4)-O(3)         | 2.297(4)   | Cu(5)-O(8)#3        | 1.913(4)   |
| Cu(5)-O(8)         | 1.913(4)   | Cu(5)-N(9)#3        | 2.020(5)   |
| Cu(5)-N(9)         | 2.020(5)   |                     |            |
| O(7)C-Cu(1)-O(5)   | 93.98(15)  | O(7)#1-Cu(1)-N(1)   | 175.79(18) |
| O(5)-Cu(1)-N(1)    | 88.19(16)  | O(7)#1-Cu(1)-N(5)   | 87.49(16)  |
| O(5)-Cu(1)-N(5)    | 162.35(18) | N(1)-Cu(1)-N(5)     | 91.53(17)  |
| O(5)-Cu(2)-N(2)    | 86.76(16)  | O(5)-Cu(2)-O(6)     | 164.72(16) |
| N(2)-Cu(2)-O(6)    | 87.16(16)  | O(5)-Cu(2)-N(7)#2   | 96.63(17)  |
| N(2)-Cu(2)-N(7)#2  | 175.1(2)   | O(6)-Cu(2)-N(7)#2   | 90.39(17)  |
| O(5)-Cu(2)-O(1)    | 104.75(16) | N(2)-Cu(2)-O(1)     | 89.50(17)  |
| O(6)-Cu(2)-O(1)    | 89.19(14)  | N(7)#2-Cu(2)-O(1)   | 86.2(2)    |
| O(7)-Cu(3)-N(6)#2  | 85.91(16)  | O(7)-Cu(3)-N(11)    | 96.44(17)  |
| N(6)#2-Cu(3)-N(11) | 177.61(18) | O(7)-Cu(3)-O(6)     | 174.82(15) |
| N(6)#2-Cu(3)-O(6)  | 89.20(16)  | N(11)-Cu(3)-O(6)    | 88.47(16)  |
| O(7)-Cu(3)-O(2)    | 93.89(16)  | N(6)#2-Cu(3)-O(2)   | 92.00(17)  |
| N(11)-Cu(3)-O(2)   | 87.42(18)  | O(6)-Cu(3)-O(2)     | 87.98(14)  |
| O(8)-Cu(4)-N(10)   | 84.27(17)  | O(8)-Cu(4)-O(6)     | 166.98(17) |
| N(10)-Cu(4)-O(6)   | 87.15(16)  | O(8)-Cu(4)-N(3)     | 97.98(17)  |
| N(10)-Cu(4)-N(3)   | 173.79(19) | O(6)-Cu(4)-N(3)     | 89.60(16)  |
| O(8)-Cu(4)-O(3)    | 99.16(18)  | N(10)-Cu(4)-O(3)    | 99.05(18)  |
| O(6)-Cu(4)-O(3)    | 91.84(15)  | N(3)-Cu(4)-O(3)     | 86.34(18)  |
| O(8)C-Cu(5)-O(8)   | 92.3(2)    | O(8)#3-Cu(5)-N(9)#3 | 86.62(17)  |
| O(8)-Cu(5)-N(9)#3  | 173.6(2)   | O(8)#3-Cu(5)-N(9)   | 173.6(2)   |
| O(8)-Cu(5)-N(9)    | 86.62(17)  | N(9)#3-Cu(5)-N(9)   | 93.7(3)    |

对称操作: #1 -x+3/2, -y+1, z-1/2; #2 -x+3/2, -y+1, z+1/2; #3 x, -y+1/2, z

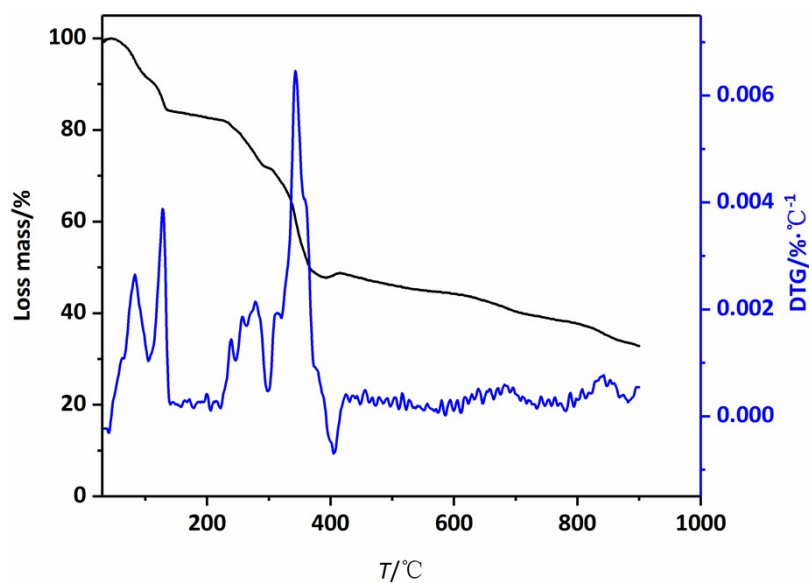

Fig. S1 TG and DTG profiles.

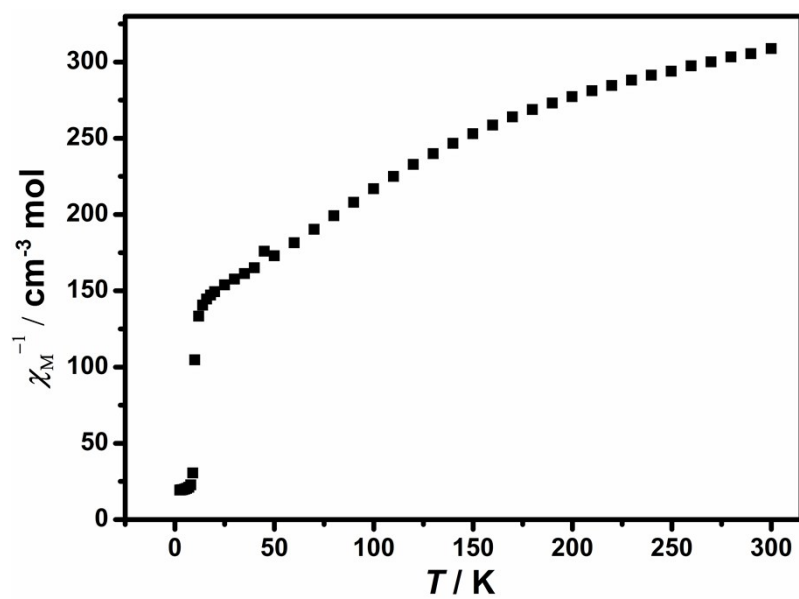

Fig.S2 Plot of  $\chi_M^{-1}$  vs.  $T$  for (1) under 1000 Oe dc field.
